# Supplementary material for: Asymmetric multifunctional organocatalytic Michael addition of nitroalkanes to α,β-unsaturated ketones
Source: Royal Society of Chemistry journal article supplement (doi:10.1039/b804540b), 2008-01-01
Supplement: b804540b.pdf [file b804540b.pdf]

# Supporting Information

## Asymmetric Multifunctional Organocatalytic Michael Addition of Nitroalkanes to $\alpha$ , $\beta$ -Unsaturated Ketones

Pengfei Li,<sup>a</sup> Yongcan Wang,<sup>a</sup> Xinmiao Liang<sup>\*a, b</sup> and Jinxing Ye<sup>\*b</sup>

<sup>a</sup> *Dalian Institute of Chemical Physics, Graduate School of the Chinese Academy of Sciences, Chinese Academy of Science, 457 Zhongshan Road, Dalian 116023, China.*

<sup>b</sup> *Engineering Research Center of Pharmaceutical Process Chemistry, Ministry of Education, School of Pharmacy, East China University of Science and Technology, 130 Meilong Road, Shanghai 200237, China.*

|                                                                     |     |
|---------------------------------------------------------------------|-----|
| A: General Information and Starting Materials                       | S2  |
| B: General Procedure for the synthesis of multifunctional catalysts | S2  |
| C: General Procedure for Asymmetric Michael Addition                | S4  |
| D: Characterization Data of Addition Products                       | S5  |
| E: CSP-HPLC or CSP-GC Analysis of Addition Products                 | S10 |
| F: References                                                       | S22 |

## A: General Information and Starting Materials

**General.** The  $^1\text{H}$ -NMR and  $^{13}\text{C}$ -NMR were recorded on a Bruke DRX 400 (400 MHz) instrument. (s = singlet, d = doublet, dd = double doublet, t = triplet, q = quartet, m = multiplet). Chromatography was carried out with silica gel (350-400 mesh) using mixtures of petroleum ether and ethyl acetate as eluent. Enantiomeric excess was determined by chiral HPLC using Agilent 1100 Series or chiral GC using Agilent GC6890. Chiralpak AD-H (0.46cm x 25 cm), Chiralpak OD-H (0.46cm x 25 cm), or Chirasil Dex CB (# CP 7502).

**Materials.** All solvent and inorganic reagents were of p.a. quality and used without purification.  $\beta$ -alkyl- $\alpha$ ,  $\beta$ -unsaturated cyclic ketones was synthesized according to the literature. <sup>[1]</sup> Both aromatic enones and heteroaromatic enone were prepared following the literature procedures. <sup>[2]</sup> Unless otherwise noted, materials were obtained from commercial sources and used without purification.

## B: General Procedure for the synthesis of multifunctional catalysts

The multifunctional catalysts were prepared following the literature procedures <sup>[3]</sup>.

### Catalyst 1

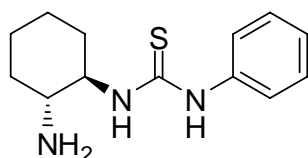

Prepared from aniline and (1R, 2R)-cyclohexane-1, 2-diamine.  $^1\text{H}$  NMR ( $\text{CDCl}_3$ ):  $\delta$  7.50 (d,  $J$  = 8 Hz, 1H), 7.41-7.24 (m, 5H), 5.30 (s, 1H), 3.79 (s, 1H), 3.29-3.25 (m, 1H), 2.15-2.03 (m, 2H), 1.85-1.82 (m, 2H), 1.67-1.22 (m, 4H).  $^{13}\text{C}$  NMR ( $\text{CDCl}_3$ ):  $\delta$  188.8, 136.4, 130.3, 127.7, 124.7, 65.1, 63.2, 33.2, 30.0, 24.9, 24.1.

### Catalyst 2

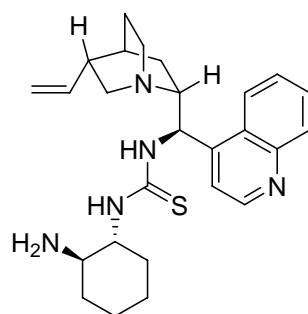

Prepared from 9-amino (9-deoxy) epincinchonine and (1R, 2R)-cyclohexane-1, 2-diamine.  $^1\text{H}$  NMR ( $\text{CDCl}_3$ ):  $\delta$  8.90 (d,  $J$  = 4 Hz, 1H), 8.37 (broad, 1H), 8.16 (d,  $J$  = 8 Hz, 1H), 7.76-7.65 (m, 2H), 7.45 (broad, 1H), 5.90-5.81 (m, 1H), 5.20-5.15 (m, 2H), 4.12 (m, 1H), 3.80-3.70 (m, 2H), 3.09-2.95 (m, 5H), 2.32-2.31 (m, 1H), 2.05 (m, 2H), 1.64-1.57 (m, 6H), 1.28-0.89 (m, 5H).  $^{13}\text{C}$  NMR ( $\text{CDCl}_3$ ):  $\delta$  182.8, 150.5, 148.9, 139.7, 130.7, 129.7, 127.3, 127.1, 124.2, 120.3, 115.7, 73.0, 61.3, 60.6, 55.9, 49.1,

47.6, 39.3, 34.1, 33.1, 32.3, 29.9, 27.7, 25.5, 24.7.

### Catalyst 3

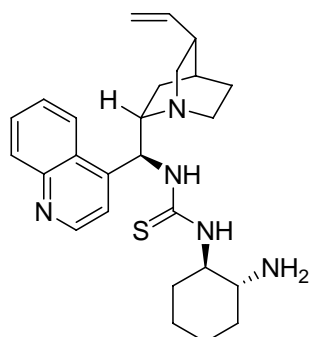

Prepared from 9-amino (9-deoxy) epicinchonidine and (1R, 2R)-cyclohexane-1, 2-diamine.  $^1\text{H}$  NMR ( $\text{CDCl}_3$ ):  $\delta$  8.96 (d,  $J = 4$  Hz, 1H), 8.65 (broad, 1H), 8.13 (d,  $J = 8$  Hz, 1H), 7.76-7.64 (m, 3H), 5.85-5.71 (m, 1H), 5.15-5.07 (m, 2H), 4.37-4.33 (m, 1H), 3.79 (m, 2H), 3.34-3.22 (m, 2H), 2.95 (m, 2H), 2.50-2.48 (m, 2H), 2.06-1.69 (m, 6H), 1.35-1.17 (m, 6H), 0.96-0.91 (m, 1H).  $^{13}\text{C}$  NMR ( $\text{CDCl}_3$ ):  $\delta$  182.4, 150.6, 148.9, 139.3, 132.3, 130.6, 129.5, 128.8, 127.3, 124.5, 120.6, 116.4, 73.0, 67.3, 61.3, 57.4, 55.9, 54.9, 53.7, 42.5, 38.5, 34.3, 32.5, 27.2, 25.5, 24.8.

### Catalyst 4

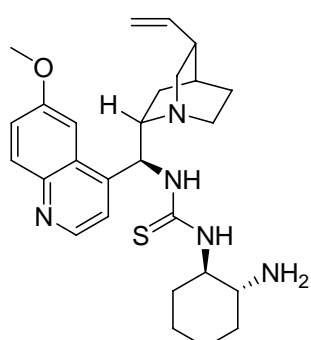

Prepared from (1R, 2R)-cyclohexane-1, 2-diamine and 9-amino (9-deoxy) epiquinine.  $^1\text{H}$  NMR ( $\text{CDCl}_3$ ):  $\delta$  8.75 (d,  $J = 3.2$  Hz, 1H), 8.05-7.98 (m, 2H), 7.47-7.38 (m, 2H), 7.36-7.35 (m, 1H), 5.75 (m, 1H), 5.05-4.98 (m, 3H), 4.02 (s, 3H), 3.71 (m, 2H), 3.15 (m, 3H), 2.97-2.65 (m, 3H), 2.49-2.28 (m, 2H), 1.87 (m, 2H), 1.70-1.56 (m, 4H), 1.41-1.19 (m, 4H), 0.96-0.91 (m, 1H).  $^{13}\text{C}$  NMR ( $\text{CDCl}_3$ ):  $\delta$  182.4, 158.4, 147.8, 145.1, 141.5, 141.0, 131.0, 128.7, 122.5, 121.5, 114.6, 102.7, 73.0, 60.7, 56.6, 56.2, 55.8, 55.5, 41.8, 41.2, 40.1, 39.4, 35.0, 32.4, 27.6, 25.8, 25.0.

### Catalyst 5

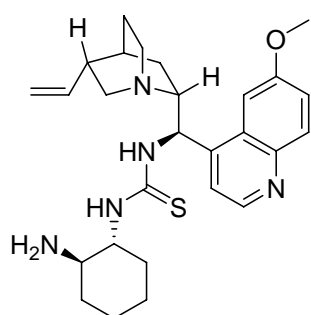

Prepared from (1R, 2R)-cyclohexane-1, 2-diamine and 9-amino (9-deoxy) epiquinidine.  $^1\text{H}$  NMR ( $\text{CDCl}_3$ ):  $\delta$  8.74 (d,  $J = 4.8$  Hz, 1H), 8.05-7.97 (m, 2H), 7.67-7.38 (m, 2H), 7.36-7.35 (m, 1H), 5.76 (m, 1H), 5.05-4.99 (m, 3H), 4.03 (s, 3H), 3.89-3.79 (m, 2H), 3.32-3.12 (m, 3H), 2.91-2.50 (m, 3H), 2.33 (m, 2H), 2.01-1.88 (m, 2H), 1.69-1.60 (m, 4H), 1.43-1.21 (m, 4H), 0.96-0.91 (m, 1H).  $^{13}\text{C}$  NMR ( $\text{CDCl}_3$ ):  $\delta$  182.4, 158.4, 148.0, 145.2, 140.9, 132.3, 131.8, 128.8, 122.0, 121.8, 115.2, 102.8, 73.0, 60.7, 56.6, 56.3, 55.8, 55.5, 41.9, 41.2, 40.1, 39.4, 34.2, 32.5, 27.5, 25.9, 25.0.

### Catalyst 6

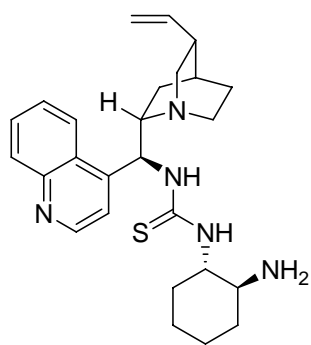

Prepared from 9-amino (9-deoxy) epicinchonidine and (1*S*, 2*S*)-cyclohexane-1, 2-diamine.  $^1\text{H}$  NMR ( $\text{CDCl}_3$ ):  $\delta$  8.92 (d,  $J = 4.4$  Hz, 1H), 8.52 (broad, 1H), 8.14 (d,  $J = 8.4$  Hz, 1H), 7.77-7.64 (m, 3H), 5.73-5.67 (m, 1H), 5.31 (m, 1H), 5.01-4.94 (m, 2H), 3.79-3.68 (m, 2H), 3.25-3.19 (m, 2H), 2.80-2.75 (m, 2H), 2.30 (m, 2H), 2.94-1.57 (m, 6H), 1.28-1.08 (m, 6H), 0.90-0.87 (m, 1H).  $^{13}\text{C}$  NMR ( $\text{CDCl}_3$ ):  $\delta$  182.3, 150.3, 148.4, 141.8, 141.2, 132.0, 130.3, 129.1, 128.6, 126.7, 124.1, 114.6, 72.8, 68.8, 66.1, 61.7, 56.3, 55.5, 53.5, 41.3, 39.5, 33.9, 31.9, 27.5, 25.8, 24.6.

### C: General Procedure for Asymmetric Michael Addition

To a solution of ethyl acetate (0.5 mL) was added  $\alpha$ ,  $\beta$ -unsaturated cyclic ketone **7** or **10** (1.0 mmol), nitroalkane **8** (3.0 mmol), catalyst (0.05-0.20 mmol). The reaction mixture was stirred at room temperature for the time indicated in Table 2 or Table 3 and then the solvent was removed under vacuum. The residue was added 1 M hydrochloric acid (5.0 mL) and extracted with  $\text{CH}_2\text{Cl}_2$  three times. The combined organic phases were dried over anhydrous  $\text{Na}_2\text{SO}_4$ , filtered and evaporated under vacuum. The residue was purified by column chromatography on silica gel (350-400 mesh) to yield the desired addition product.

## D: Characterization Data of Addition Products <sup>[4]</sup>

### 3-(nitromethyl)cyclohexanone

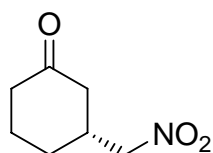

Yellowy oil. <sup>1</sup>H-NMR (CDCl<sub>3</sub>): δ 4.42–4.26 (m, 2H), 2.65–2.64 (m, 1H), 2.52–2.43 (m, 1H), 2.32–2.29 (m, 1H), 2.21–2.11 (m, 2H), 2.06–1.96 (m, 1H), 1.80–1.73 (m, 2H), 1.54–1.50 (m, 1H). <sup>13</sup>C-NMR (CDCl<sub>3</sub>): δ 208.4, 80.3, 44.7, 41.1, 37.4, 28.4, 24.4. The enantiomeric excess was determined by HPLC. [AD-H column, 220 nm, hexane: IPA = 9:1, 0.8 mL/min]: 18.9 min (major), 21.8 min (minor).

### 4,4-dimethyl-3-(nitromethyl)cyclohexanone

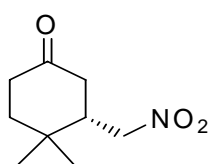

Yellowy oil. <sup>1</sup>H-NMR (CDCl<sub>3</sub>): δ 4.58 (dd, J = 4.0, 12.4 Hz, 1H), 4.16 (dd, J = 10.0, 12.0 Hz, 1H), 2.52–2.25 (m, 5H), 2.18–1.73 (m, 2H), 1.15 (s, 3H), 1.07 (s, 3H). <sup>13</sup>C-NMR (CDCl<sub>3</sub>): δ 208.4, 45.1, 41.3, 39.9, 37.9, 32.5, 28.7, 19.8. The enantiomeric excess was determined by HPLC. [AD-H column, 220 nm, hexane: IPA = 40:1, 0.8 mL/min]: 27.2 min (minor), 29.2 min (major).

### 3-(nitromethyl)cyclopentanone

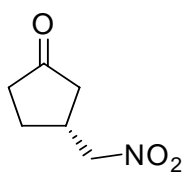

Yellowy oil. <sup>1</sup>H-NMR (CDCl<sub>3</sub>): δ 4.49 (dd, J = 1.0, 7.2 Hz, 2H), 3.02 (m, 1H), 2.57–2.51 (m, 1H), 2.42–2.37 (m, 1H), 2.34–2.27 (m, 2H), 2.06–1.99 (m, 1H), 1.77–1.69 (m, 1H). <sup>13</sup>C-NMR (CDCl<sub>3</sub>): δ 215.6, 79.3, 42.3, 38.0, 35.4, 26.9. The enantiomeric excess was determined by HPLC. [OD-H column, 220 nm, hexane: IPA = 9:1, 0.8 mL/min]: 31.0 min (major), 34.6 min (minor).

### 3-(nitromethyl)cycloheptanone

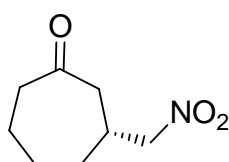

Colorless oil. <sup>1</sup>H-NMR (CDCl<sub>3</sub>): δ 4.31 (dd, J = 7.6, 1.2 Hz, 2H), 2.62–2.57 (m, 1H), 2.55–2.48 (m, 4H), 1.99–1.91 (m, 3H), 1.64–1.62 (m, 1H), 1.53–1.42 (m, 2H). <sup>13</sup>C-NMR (CDCl<sub>3</sub>): δ 211.3, 80.8, 46.6, 44.0, 35.0, 33.8, 28.2, 24.3. The enantiomeric excess was determined by GC. [Chirasil-Dex CB column, 1.0 mL/min, 10°C/min from 70°C to 140°C then hold for 55 min.]: 54.3 min (minor), 55.3 min (major).

### 3-methyl-3-(nitromethyl)cyclohexanone

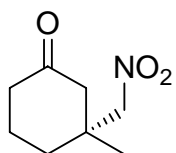

Colorless oil. <sup>1</sup>H-NMR (CDCl<sub>3</sub>): δ 4.31 (dd, J = 10.8, 19.2 Hz, 2H), 2.26–2.45 (m, 4H), 1.72–2.02 (m, 4H), 1.13 (s, 3H). <sup>13</sup>C-NMR (CDCl<sub>3</sub>): δ 209.10, 85.15, 50.99, 40.73, 40.02, 33.73, 3.38, 21.55. The enantiomeric excess was determined by GC. [Chirasil-Dex CB column, 1.0 mL/min, 10°C/min from 70°C to 180°C then hold for 10 min.]: 16.5 min (major), 16.6 min (minor).

### 3-(nitromethyl)-3-propylcyclohexanone

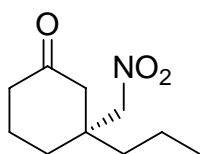

Yellowy oil. <sup>1</sup>H-NMR (CDCl<sub>3</sub>): δ 4.34 (s, 2H), 2.43–2.31 (m, 4H), 2.03–1.74 (m, 4H), 1.42–1.25 (m, 4H), 0.93 (t, J = 6.8 Hz, 3H). <sup>13</sup>C-NMR (CDCl<sub>3</sub>): δ 209.4, 82.2, 49.7, 42.7, 40.8, 38.0, 31.6, 21.2, 16.3, 14.6. The enantiomeric excess was determined by GC. [Chirasil-Dex CB column, 1.0 mL/min, 10°C/min from 70°C

to 200°C then hold for 5 min.]: 17.3 min (minor), 17.4 min (major).

### 3-butyl-3-(nitromethyl)cyclohexanone

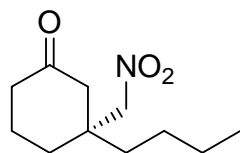

Orange oil.  $^1\text{H-NMR}$  ( $\text{CDCl}_3$ ):  $\delta$  4.34 (s, 2H), 2.43-2.28 (m, 4H), 2.03-1.70 (m, 4H), 1.45-1.22 (m, 6H), 0.91 (t,  $J = 7.0$  Hz, 3H).  $^{13}\text{C-NMR}$  ( $\text{CDCl}_3$ ):  $\delta$  209.4, 82.2, 49.8, 42.6, 40.8, 35.4, 31.6, 25.1, 23.2, 21.2, 14.1. The enantiomeric excess was determined by GC. [Chirasil-Dex CB column, 1.0 mL/min, 10°C/min from 70°C to 200°C then hold for 10 min.]: 18.6 min (minor), 18.8 min (major).

### 3-(nitromethyl)-3-pentylcyclohexanone

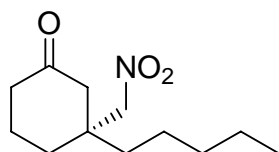

Orange oil.  $^1\text{H-NMR}$  ( $\text{CDCl}_3$ ):  $\delta$  4.34 (s, 2H), 2.43-2.28 (m, 4H), 1.99-1.73 (m, 4H), 1.42-1.25 (m, 8H), 0.89 (t,  $J = 6.8$  Hz, 3H).  $^{13}\text{C-NMR}$  ( $\text{CDCl}_3$ ):  $\delta$  209.4, 82.1, 49.7, 42.6, 40.8, 35.6, 32.2, 31.6, 22.6, 22.5, 21.1, 14.2. The enantiomeric excess was determined by GC. [Chirasil-Dex CB column, 1.0 mL/min, 10°C/min from 70°C to 200°C then hold for 10 min.]: 20.6 min (minor), 20.9 min (major).

### 3-(2-nitropropan-2-yl)cyclohexanone

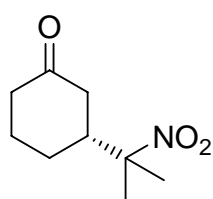

White solid.  $^1\text{H-NMR}$  ( $\text{CDCl}_3$ ):  $\delta$  2.45-2.35 (m, 3H), 2.26-2.24 (m, 1H), 2.16-2.12 (m, 2H), 1.83-1.78 (m, 1H), 1.65-1.60 (m, 1H), 1.58 (s, 3H), 1.57 (s, 3H), 1.47-1.37 (m, 1H).  $^{13}\text{C-NMR}$  ( $\text{CDCl}_3$ ):  $\delta$  209.2, 90.9, 46.9, 43.0, 41.1, 26.3, 24.7, 23.9, 22.8. The enantiomeric excess was determined by GC. [Chirasil-Dex CB column, 1.0 mL/min, 10°C/min from 70°C to 140°C then hold for 40 min.]: 41.4 min (minor), 42.1 min (major).

### 3-(1-nitroethyl)cyclohexanone

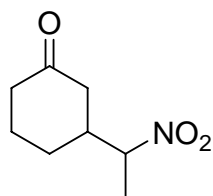

Damask oil.  $^1\text{H-NMR}$  (an inseparable mixture of diastereomers,  $\text{CDCl}_3$ ):  $\delta$  4.54-4.46 (m, 1H<sub>maj</sub> and 1H<sub>min</sub>), 2.44-2.12 (m, 6H<sub>maj</sub> and 6H<sub>min</sub>), 1.98-1.84 (m, 1H<sub>maj</sub> and 1H<sub>min</sub>), 1.69-1.66 (m, 1H<sub>maj</sub> and 1H<sub>min</sub>), 1.56 (d,  $J = 6.8$  Hz, 3H<sub>maj</sub>), 1.54 (d,  $J = 6.8$  Hz, 3H<sub>min</sub>), 1.49-1.45 (m, 1H<sub>maj</sub> and 1H<sub>min</sub>). The enantiomeric excess was determined by HPLC. [AD-H column, 220 nm, hexane: IPA = 40:1, 0.8 mL/min]: 35.2 min (minor1), 39.8 min (major1), 51.0 (major2), 58.8 min (minor2).

### 3-methyl-3-(1-nitroethyl)cyclohexanone (Diastereomer major)

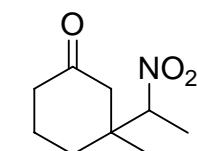

Colorless oil.  $^1\text{H-NMR}$  ( $\text{CDCl}_3$ ):  $\delta$  4.53 (dd,  $J = 6.8, 13.6$  Hz, 1H), 2.38-2.35 (m, 1H), 2.31-2.29 (m, 1H), 2.26-2.21 (m, 2H), 2.08-2.05 (m, 1H), 1.80-1.65 (m, 3H), 1.52 (d,  $J = 6.8$  Hz, 3H), 1.04 (s, 3H).  $^{13}\text{C-NMR}$  ( $\text{CDCl}_3$ ):  $\delta$  209.5, 90.6, 50.2, 42.0, 40.8, 32.8, 21.6, 20.3, 13.9. The enantiomeric excess was determined by GC. [Chirasil-Dex CB column, 1.0 mL/min, 10°C/min from 70°C to 160°C then hold for 20 min.]: 20.8 min (major), 21.3 min (minor).

### 3-methyl-3-(1-nitroethyl)cyclohexanone (Diastereomer minor)

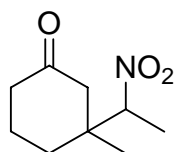

Colorless oil.  $^1\text{H-NMR}$  ( $\text{CDCl}_3$ ):  $\delta$  4.51 (dd,  $J = 6.9, 13.7$  Hz, 1H), 2.53 (d,  $J = 13.7$  Hz, 1H), 2.41–2.37 (m, 1H), 2.29–2.26 (m, 1H), 2.17–2.12 (m, 1H), 2.01–1.99 (m, 1H), 1.90–1.80 (m, 1H), 1.71–1.64 (m, 2H), 1.53 (d,  $J = 7.3$  Hz, 3H), 1.00 (s, 3H). The enantiomeric excess was determined by GC. [Chirasil-Dex CB column, 1.0 mL/min,  $10^\circ\text{C}/\text{min}$  from  $70^\circ\text{C}$  to  $140^\circ\text{C}$  then hold for 20 min.]: 34.0 min (major), 35.3 min (minor).

#### 4,4-dimethyl-3-(1-nitroethyl)cyclohexanone

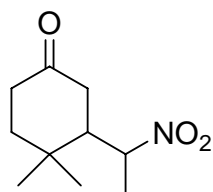

Colorless solid.  $^1\text{H-NMR}$  ( $\text{DMSO-D}_6$ ):  $\delta$  5.03–4.93 (m, 1Hmaj and 1Hmin), 2.53–1.95 (m, 6Hmaj and 6Hmin), 1.59–1.57 (m, 1Hmaj and 1Hmin), 1.46 (d,  $J = 6.8$  Hz, 3Hmaj), 1.39 (d,  $J = 6.8$  Hz, 3Hmin), 1.11–1.00 (m, 6Hmaj and 6Hmin).  $^{13}\text{C-NMR}$  ( $\text{DMSO-D}_6$ ):  $\delta$  209.4 (maj), 83.5 (min), 8.30 (maj), 49.0 (maj), 48.6 (min), 38.4 (min), 38.0 (maj), 37.5, 33.4, 28.4 (maj), 28.3 (min), 19.3 (min), 19.0 (maj), 16.0. The enantiomeric excess was determined by GC. [Chirasil-Dex CB column, 1.0 mL/min,  $10^\circ\text{C}/\text{min}$  from  $70^\circ\text{C}$  to  $140^\circ\text{C}$  then hold for 45 min.]: 42.0 min (major1), 43.8 min (minor1), 49.0 (major2), 50.0 min (minor2).

#### 5-nitro-4-phenylpentan-2-one

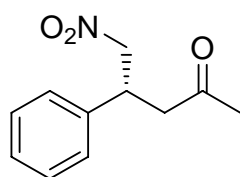

White solid.  $^1\text{H-NMR}$  ( $\text{CDCl}_3$ ):  $\delta$  7.33–7.26 (m, 3H), 7.23–7.20 (m, 2H), 4.69 (dd,  $J = 6.8, 12.4$  Hz, 1H), 4.60 (dd,  $J = 7.6, 12.4$  Hz, 1H), 4.00 (apparent qn,  $J = 7.2$  Hz, 1H), 2.91 (d,  $J = 7.2$  Hz, 2H), 2.12 (s, 3H).  $^{13}\text{C-NMR}$  ( $\text{CDCl}_3$ ):  $\delta$  205.6, 139.1, 129.3, 128.2, 127.6, 79.7, 46.4, 39.3, 30.6. The enantiomeric excess was determined by HPLC. [AD-H column, 220 nm, hexane: IPA = 20:1, 0.8 mL/min.]: 20.3 min (minor), 22.2 min (major).

#### 5-nitro-4-(4-nitrophenyl)pentan-2-one

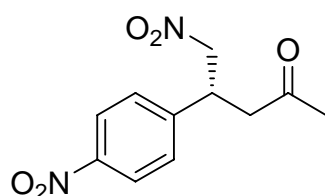

Orange oil.  $^1\text{H-NMR}$  ( $\text{CDCl}_3$ ):  $\delta$  8.20 (d,  $J = 10.0$  Hz, 2H), 7.43 (d,  $J = 10.0$  Hz, 2H), 4.76 (dd,  $J = 6.4, 12.8$  Hz, 1H), 4.65 (dd,  $J = 8.4, 12.8$  Hz, 1H), 4.18–4.11 (m, 1H), 2.97 (dd,  $J = 3.2, 6.8$  Hz, 2H), 2.16 (s, 3H).  $^{13}\text{C-NMR}$  ( $\text{CDCl}_3$ ):  $\delta$  204.6, 147.8, 146.6, 128.8, 124.5, 78.8, 45.9, 38.9, 30.5. The enantiomeric excess was determined by HPLC. [AD-H column, 220 nm, hexane: IPA = 9:1, 0.8 mL/min.]: 43.4 min (minor), 60.0 min (major).

#### 5-nitro-4-p-tolylpentan-2-one

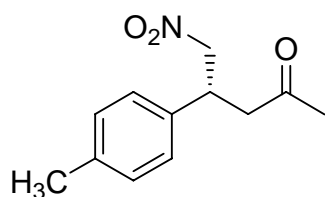

Orange solid.  $^1\text{H-NMR}$  ( $\text{CDCl}_3$ ):  $\delta$  7.14–7.08 (m, 4H), 4.66 (dd,  $J = 7.0, 12.2$  Hz, 1H), 4.57 (dd,  $J = 7.8, 12.2$  Hz, 1H), 4.0–3.93 (m, 1H), 2.91 (d,  $J = 6.8$  Hz, 2H), 2.31 (s, 3H), 2.11 (s, 3H).  $^{13}\text{C-NMR}$  ( $\text{CDCl}_3$ ):  $\delta$  205.7, 137.9, 136.0, 130.0, 127.5, 79.9, 46.4, 39.0, 30.7, 21.3. The enantiomeric excess was determined by HPLC. [AD-H column, 220 nm, hexane:IPA = 9:1, 0.8 mL/min.]: 11.1 min (minor), 12.4 min (major).

#### 5-nitro-4-o-tolylpentan-2-one

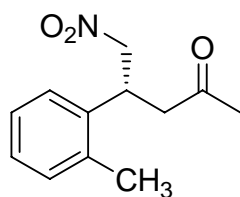

Colorless oil.  $^1\text{H-NMR}$  ( $\text{CDCl}_3$ ):  $\delta$  7.19-7.14 (m, 4H), 4.64 (dd,  $J = 7.4, 12.2$  Hz, 1H), 4.56 (dd,  $J = 7.2, 12.4$  Hz, 1H), 4.31 (m, 1H), 2.90 (dd,  $J = 2.6, 7.0$  Hz, 2H), 2.44 (s, 3H), 2.10 (s, 3H).  $^{13}\text{C-NMR}$  ( $\text{CDCl}_3$ ):  $\delta$  205.7, 137.3, 136.6, 131.3, 127.8, 126.8, 125.6, 79.2, 47.0, 34.4, 30.6, 19.8. The enantiomeric excess was determined by HPLC. [AD-H column, 220 nm, hexane: IPA = 20:1, 0.8mL/min.]: 14.5 min (minor), 15.7 min (major).

#### 4-(4-methoxyphenyl)-5-nitropentan-2-one

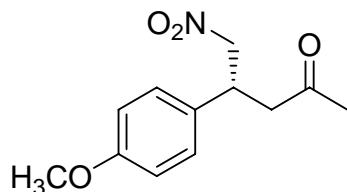

White solid.  $^1\text{H-NMR}$  ( $\text{CDCl}_3$ ):  $\delta$  7.13 (d,  $J = 11.6$  Hz, 2H), 6.85 (d,  $J = 11.6$  Hz, 2H), 4.65 (dd,  $J = 6.8, 12.4$  Hz, 1H), 4.55 (dd,  $J = 7.8, 12.2$  Hz, 1H), 3.95 (m, 1H), 3.77 (s, 3H), 2.88 (d,  $J = 7.2$  Hz, 2H), 2.11 (s, 3H).  $^{13}\text{C-NMR}$  ( $\text{CDCl}_3$ ):  $\delta$  205.8, 159.4, 130.9, 128.7, 114.7, 80.0, 55.5, 46.5, 38.7, 30.7. The enantiomeric excess was determined by HPLC. [AD-H column, 220 nm, hexane: IPA = 9:1, 0.8mL/min.]: 17.2 min (minor), 19.2 min (major).

#### 4-(2-methoxyphenyl)-5-nitropentan-2-one

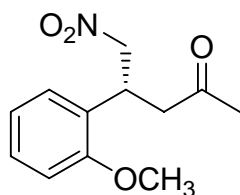

Yellowy solid.  $^1\text{H-NMR}$  ( $\text{CDCl}_3$ ):  $\delta$  7.26-7.23 (m, 2H), 7.13 (dd,  $J = 7.4, 1.4$  Hz, 1H), 6.91-6.87 (m, 2H), 4.74 (dd,  $J = 7.0, 12.2$  Hz, 1H), 4.70 (dd,  $J = 6.6, 12.2$  Hz, 1H), 4.25-4.18 (m, 1H), 3.86 (s, 3H), 3.05-2.92 (m, 2H), 2.12 (s, 3H).  $^{13}\text{C-NMR}$  ( $\text{CDCl}_3$ ):  $\delta$  206.4, 157.3, 129.5, 129.2, 126.7, 121.6, 111.2, 78.1, 55.6, 44.7, 35.6, 30.5. The enantiomeric excess was determined by HPLC. [OD-H column, 220 nm, hexane: IPA = 9:1, 0.8mL/min.]: 19.8 min (major), 21.1 min (minor).

#### 4-(4-chlorophenyl)-5-nitropentan-2-one

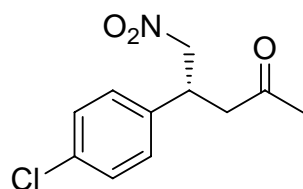

White solid.  $^1\text{H-NMR}$  ( $\text{CDCl}_3$ ):  $\delta$  7.30 (d,  $J = 6.4$  Hz, 2H), 7.16 (d,  $J = 6.4$  Hz, 1H), 4.68 (dd,  $J = 4.0, 12.0$  Hz, 1H), 4.58 (dd,  $J = 8.0, 12.0$  Hz, 1H), 4.03-3.95 (m, 1H), 2.89 (d,  $J = 8.0$  Hz, 2H), 2.12 (s, 3H).  $^{13}\text{C-NMR}$  ( $\text{CDCl}_3$ ):  $\delta$  205.2, 137.6, 134.0, 130.2, 129.1, 79.4, 46.2, 38.6, 30.6. The enantiomeric excess was determined by HPLC. [AD-H column, 220 nm, hexane: IPA = 9:1, 0.8mL/min.]: 15.3 min (minor), 17.6 min (major).

#### 5-nitro-4-(thiophen-2-yl)pentan-2-one

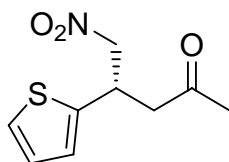

Brown oil.  $^1\text{H-NMR}$  ( $\text{CDCl}_3$ ):  $\delta$  7.20 (dd,  $J = 1.2, 4.8$  Hz, 1H), 6.90-6.95 (m, 2H), 4.71 (dd,  $J = 12.4, 6.4$  Hz, 1H), 4.62 (dd,  $J = 12.4, 7.6$  Hz, 1H), 4.32 (m, 1H), 2.97 (d,  $J = 6.8$  Hz, 2H), 2.16 (s, 3H).  $^{13}\text{C-NMR}$  ( $\text{CDCl}_3$ ):  $\delta$  205.2, 141.8, 127.4, 125.8, 125.0, 79.9, 47.1, 34.7, 30.6. The enantiomeric excess was determined by HPLC. [OD-H column, 220 nm, hexane: IPA = 9:1, 0.8mL/min.]: 30.7 min (major), 38.4 min (minor).

#### 4-(nitromethyl)heptan-2-one

Colorless oil.  $^1\text{H-NMR}$  ( $\text{CDCl}_3$ ):  $\delta$  4.45 (d,  $J = 7.2$  Hz, 2H), 2.64-2.53 (m, 3H), 2.17 (s, 3H),



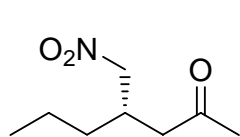

1.39-1.34 (m, 4H), 0.92 (t,  $J = 7.2$  Hz, 3H).  $^{13}\text{C-NMR}$  ( $\text{CDCl}_3$ ):  $\delta$  206.9, 78.6, 44.8, 33.8, 33.0, 30.6, 20.0, 14.1. The enantiomeric excess was determined by GC. [Chirasil-Dex CB column, 1.0 mL/min,  $10^\circ\text{C}/\text{min}$  from  $70^\circ\text{C}$  to  $150^\circ\text{C}$  then hold for 10 min.]: 13.9 min (major), 14.1 min (minor).

#### 4-(nitromethyl)octan-2-one

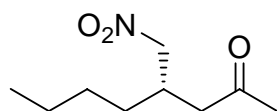

Colorless oil.  $^1\text{H-NMR}$  ( $\text{CDCl}_3$ ):  $\delta$  4.45 (d,  $J = 7.2$  Hz, 2H), 2.64-2.53 (m, 3H), 2.17 (s, 3H), 1.41-1.29 (m, 6H), 0.90 (t,  $J = 6.8$  Hz, 3H).  $^{13}\text{C-NMR}$  ( $\text{CDCl}_3$ ):  $\delta$  206.9, 78.6, 44.9, 33.2, 31.4, 30.7, 29.0, 22.7, 14.1. The enantiomeric excess was determined by GC. [Chirasil-Dex CB column, 1.0 mL/min,  $10^\circ\text{C}/\text{min}$  from  $70^\circ\text{C}$  to  $150^\circ\text{C}$  then hold for 10 min.]: 16.4 min (major), 16.6 min (minor).

#### 5-methyl-5-nitro-4-phenylhexan-2-one

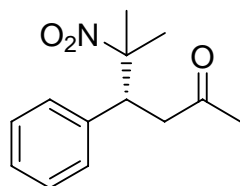

Yellowy oil.  $^1\text{H-NMR}$  ( $\text{CDCl}_3$ ):  $\delta$  7.32-7.20 (m, 3H), 7.20-7.18 (m, 2H), 3.93 (dd,  $J = 3.4, 10.6$  Hz, 1H), 3.09 (dd,  $J = 10.6, 17.0$  Hz, 1H), 2.72 (dd,  $J = 3.6, 17.2$  Hz, 1H), 2.02 (s, 3H), 1.55 (s, 3H), 1.48 (s, 3H).  $^{13}\text{C-NMR}$  ( $\text{CDCl}_3$ ):  $\delta$  205.3, 137.9, 129.4, 128.8, 128.1, 91.3, 49.0, 44.3, 30.5, 26.1, 22.7. The enantiomeric excess was determined by GC. [Chirasil-Dex CB column, 1.0 mL/min,  $10^\circ\text{C}/\text{min}$  from  $70^\circ\text{C}$  to  $150^\circ\text{C}$  then hold for 35 min.]: 40.8 min (major), 41.5 min (minor).

#### 5-nitro-4-phenylhexan-2-one (Diastereomer major)

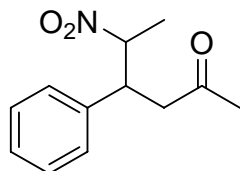

Colorless oil.  $^1\text{H-NMR}$  ( $\text{CDCl}_3$ ):  $\delta$  7.35-7.18 (m, 5H), 4.76 (qd,  $J = 6.8, 10.0$  Hz, 1H), 3.71 (apparent td,  $J = 4.4, 9.6$  Hz, 1H), 2.97 (dd,  $J = 9.6, 16.8$  Hz, 1H), 2.74 (dd,  $J = 4.4, 17.2$  Hz, 1H), 2.01 (s, 3H), 1.32 (d,  $J = 6.8$  Hz, 3H).  $^{13}\text{C-NMR}$  ( $\text{CDCl}_3$ ):  $\delta$  205.1, 138.5, 129.3, 128.4, 128.1, 87.4, 46.5, 45.6, 30.7, 18.0. The enantiomeric excess was determined by GC. [Chirasil-Dex CB column, 1.0 mL/min,  $10^\circ\text{C}/\text{min}$  from  $70^\circ\text{C}$  to  $135^\circ\text{C}$  then hold for 65 min.]: 60.6 min (minor), 61.6 min (major).

#### 5-nitro-4-phenylhexan-2-one (Diastereomer minor)

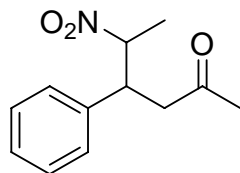

Colorless oil.  $^1\text{H-NMR}$  ( $\text{CDCl}_3$ ):  $\delta$  7.33-7.26 (m, 3H), 7.15-7.13 (m, 2H), 4.88 (qn,  $J = 6.8$  Hz, 1H), 3.73 (apparent q,  $J = 6.8$  Hz, 1H), 3.05 (dd,  $J = 6.8, 17.6$  Hz, 1H), 2.89 (dd,  $J = 7.6, 17.6$  Hz, 1H), 2.11 (s, 3H), 1.48 (d,  $J = 8.0$  Hz, 3H).  $^{13}\text{C-NMR}$  ( $\text{CDCl}_3$ ):  $\delta$  206.0, 138.1, 129.0, 128.4, 128.2, 86.1, 45.0, 44.8, 30.8, 17.0. The enantiomeric excess was determined by GC. [Chirasil-Dex CB column, 1.0 mL/min,  $10^\circ\text{C}/\text{min}$  from  $70^\circ\text{C}$  to  $135^\circ\text{C}$  then hold for 65 min.]: 67.3 min (major), 69.3 min (minor).

## E: CSP-HPLC or CSP-GC Analysis of Addition Products

### 3-(nitromethyl)cyclohexanone

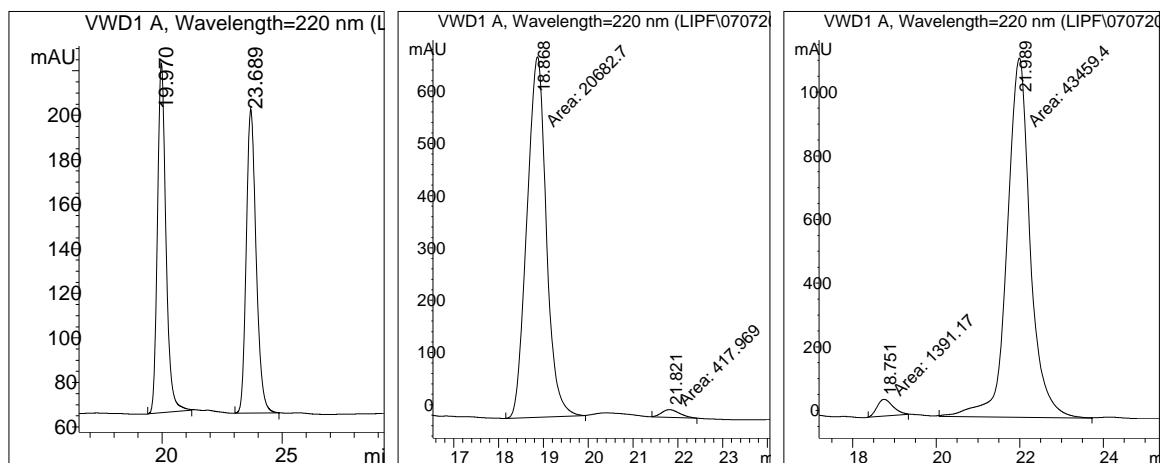

#### Racemic adduct

| # | Time   | Area   | Height | Width  | Area%  | Symmetry |
|---|--------|--------|--------|--------|--------|----------|
| 1 | 19.97  | 3864.8 | 156.9  | 0.3762 | 49.778 | 0.796    |
| 2 | 23.689 | 3899.2 | 136.6  | 0.4378 | 50.222 | 0.771    |

#### Asymmetric adduct (Catalyzed by **3**)

| # | Time   | Area    | Height | Width | Area%  | Symmetry |
|---|--------|---------|--------|-------|--------|----------|
| 1 | 18.868 | 20682.7 | 689.5  | 0.5   | 98.019 | 1.127    |
| 2 | 21.821 | 418     | 14.9   | 0.469 | 1.981  | 0.729    |

#### Asymmetric adduct (Catalyzed by **6**)

| # | Time   | Area    | Height | Width  | Area%  | Symmetry |
|---|--------|---------|--------|--------|--------|----------|
| 1 | 18.751 | 1391.2  | 52.8   | 0.439  | 3.102  | 0.765    |
| 2 | 21.989 | 43459.4 | 1128.7 | 0.6417 | 96.898 | 1.08     |

### 4,4-dimethyl-3-(nitromethyl)cyclohexanone

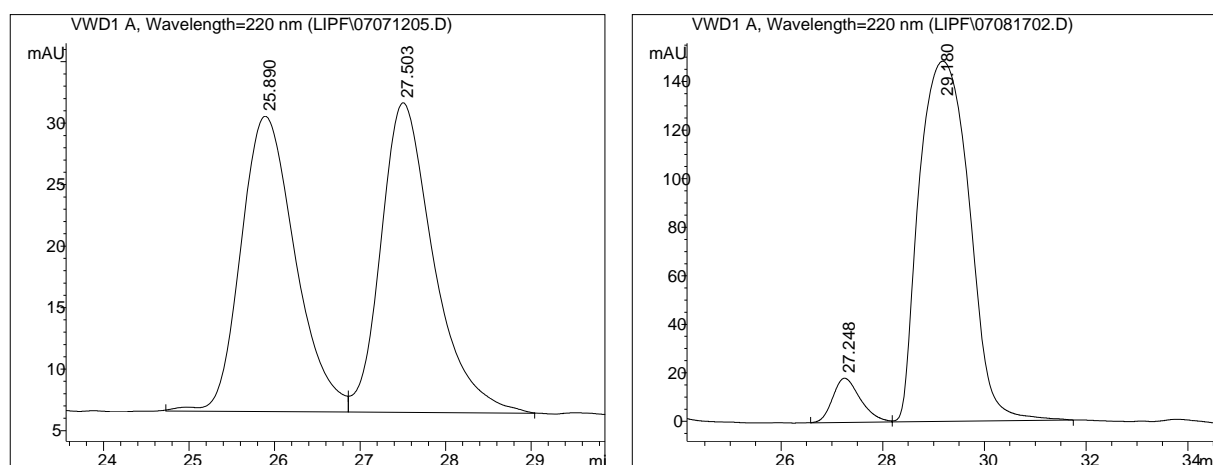

### Racemic adduct

| # | Time   | Area   | Height | Width  | Area%  | Symmetry |
|---|--------|--------|--------|--------|--------|----------|
| 1 | 25.89  | 1058.5 | 24     | 0.6845 | 49.555 | 0.779    |
| 2 | 27.503 | 1077.5 | 25.2   | 0.6461 | 50.445 | 0.684    |

### Asymmetric adduct

| # | Time   | Area    | Height | Width  | Area%  | Symmetry |
|---|--------|---------|--------|--------|--------|----------|
| 1 | 27.248 | 690.5   | 18.2   | 0.5735 | 6.381  | 0.713    |
| 2 | 29.18  | 10130.9 | 148.4  | 1.1636 | 93.619 | 0.851    |

### 3-(nitromethyl)cyclopentanone

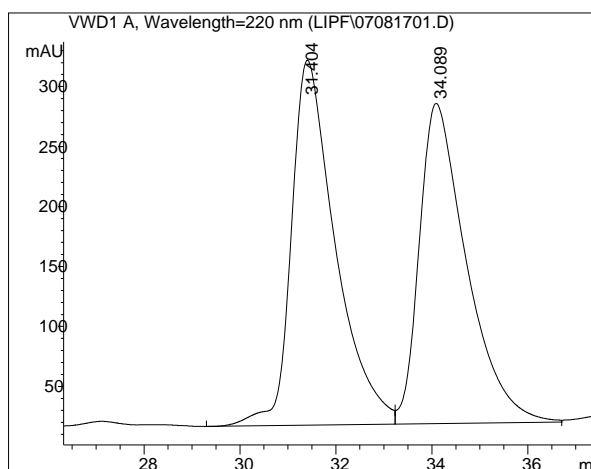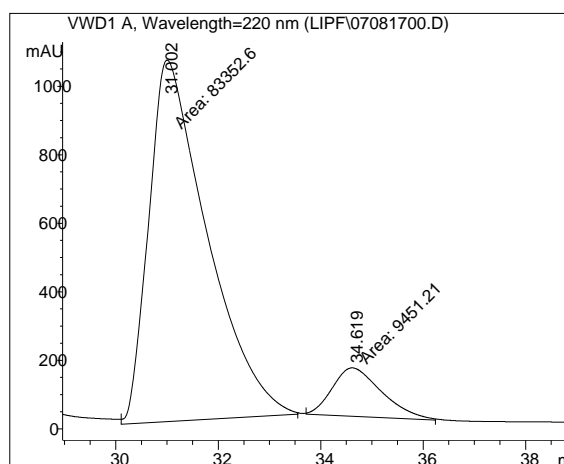

### Racemic adduct

| # | Time   | Area    | Height | Width  | Area%  | Symmetry |
|---|--------|---------|--------|--------|--------|----------|
| 1 | 31.404 | 19379.6 | 304.3  | 0.9424 | 51.497 | 0.561    |
| 2 | 34.089 | 18252.6 | 267    | 1.0218 | 48.503 | 0.522    |

### Asymmetric adduct

| # | Time   | Area    | Height | Width  | Area%  | Symmetry |
|---|--------|---------|--------|--------|--------|----------|
| 1 | 31.002 | 83352.6 | 1054.7 | 1.3172 | 89.816 | 0.452    |
| 2 | 34.619 | 9451.2  | 141.1  | 1.1166 | 10.184 | 0.65     |

### 3-(nitromethyl)cycloheptanone

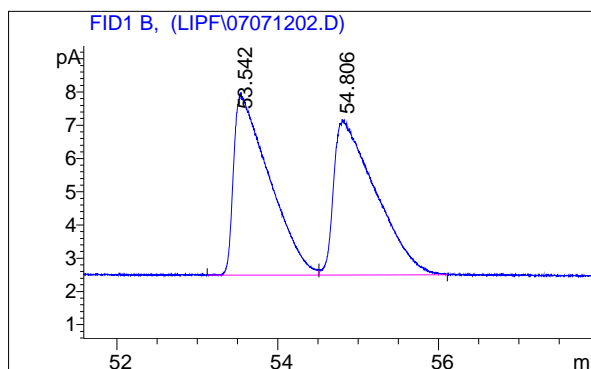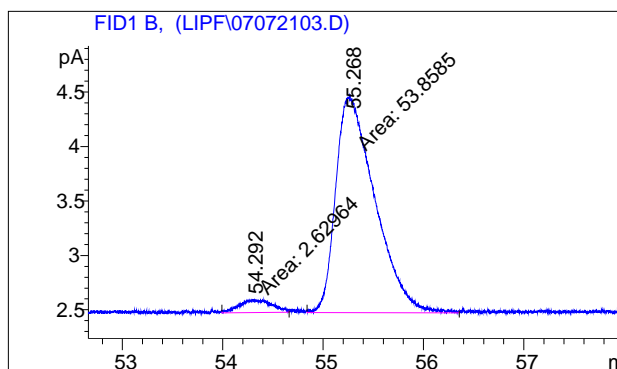

### Racemic adduct

| # | Time   | Area  | Height | Width  | Area%  | Symmetry |
|---|--------|-------|--------|--------|--------|----------|
| 1 | 53.542 | 166.6 | 5.5    | 0.3621 | 49.741 | 0.249    |
| 2 | 54.806 | 168.3 | 4.7    | 0.4263 | 50.259 | 0.264    |

### Asymmetric adduct

| # | Time   | Area | Height | Width  | Area%  | Symmetry |
|---|--------|------|--------|--------|--------|----------|
| 1 | 54.292 | 2.6  | 1.2E-1 | 0.3599 | 4.655  | 0.667    |
| 2 | 55.268 | 53.9 | 2      | 0.4483 | 95.345 | 0.556    |

### 3-methyl-3-(nitromethyl)cyclohexanone

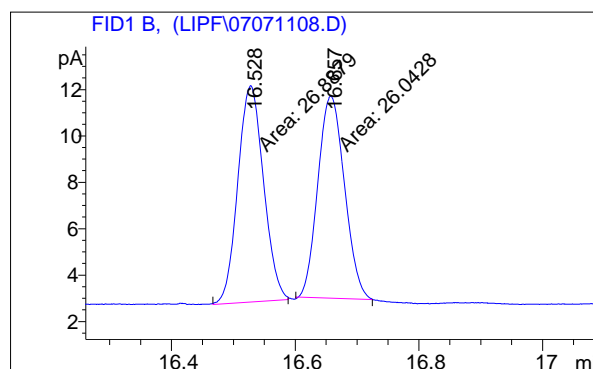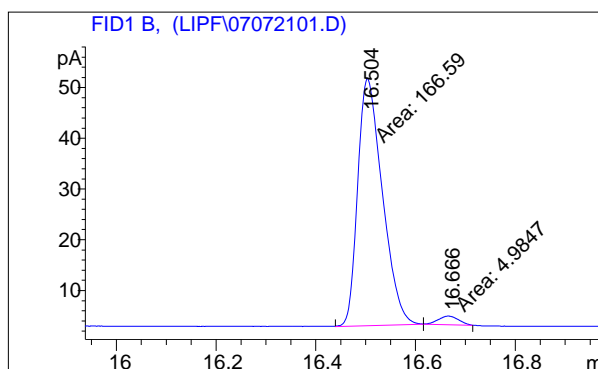

### Racemic adduct

| # | Time   | Area | Height | Width  | Area%  | Symmetry |
|---|--------|------|--------|--------|--------|----------|
| 1 | 16.528 | 26.9 | 9.4    | 0.0479 | 50.798 | 0.919    |
| 2 | 16.657 | 26   | 8.7    | 0.0497 | 49.202 | 0.752    |

### Asymmetric adduct

| # | Time   | Area  | Height | Width  | Area%  | Symmetry |
|---|--------|-------|--------|--------|--------|----------|
| 1 | 16.504 | 166.6 | 48.7   | 0.057  | 97.095 | 0.751    |
| 2 | 16.666 | 5     | 1.7    | 0.0484 | 2.905  | 0.769    |

### 3-(nitromethyl)-3-propylcyclohexanone

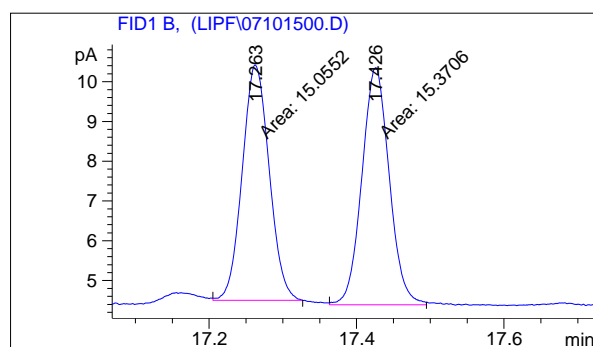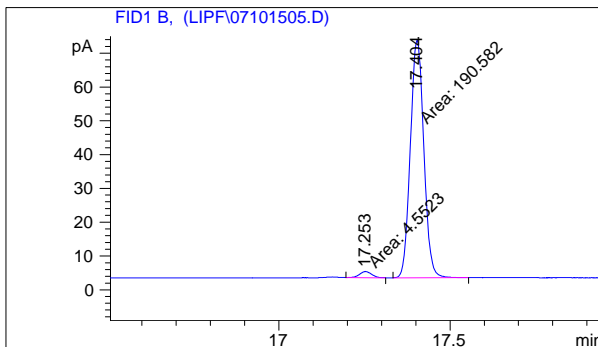

### Racemic adduct

| # | Time   | Area | Height | Width  | Area%  | Symmetry |
|---|--------|------|--------|--------|--------|----------|
| 1 | 17.263 | 15.1 | 5.9    | 0.0424 | 49.482 | 1.138    |
| 2 | 17.426 | 15.4 | 6      | 0.0427 | 50.518 | 0.806    |

### Asymmetric adduct

| # | Time   | Area  | Height | Width  | Area%  | Symmetry |
|---|--------|-------|--------|--------|--------|----------|
| 1 | 17.253 | 4.6   | 1.8    | 0.0411 | 2.333  | 0.705    |
| 2 | 17.404 | 190.6 | 70.8   | 0.0448 | 97.667 | 1.194    |

### 3-butyl-3-(nitromethyl)cyclohexanone

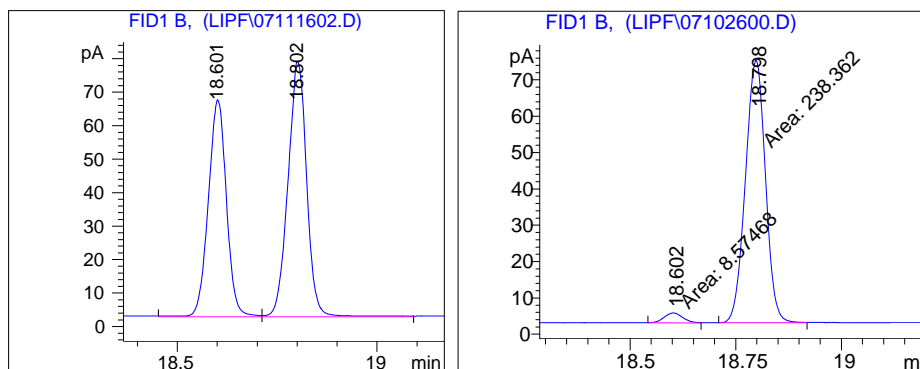

### Racemic adduct

| # | Time   | Area  | Height | Width  | Area%  | Symmetry |
|---|--------|-------|--------|--------|--------|----------|
| 1 | 18.601 | 204.6 | 64.4   | 0.0491 | 45.194 | 1.034    |
| 2 | 18.802 | 248.1 | 75.5   | 0.0503 | 54.806 | 1.054    |

### Asymmetric adduct

| # | Time   | Area  | Height | Width  | Area%  | Symmetry |
|---|--------|-------|--------|--------|--------|----------|
| 1 | 18.602 | 8.6   | 2.8    | 0.0516 | 3.472  | 0.936    |
| 2 | 18.798 | 238.4 | 72.4   | 0.0548 | 96.528 | 0.984    |

### 3-(nitromethyl)-3-pentylcyclohexanone

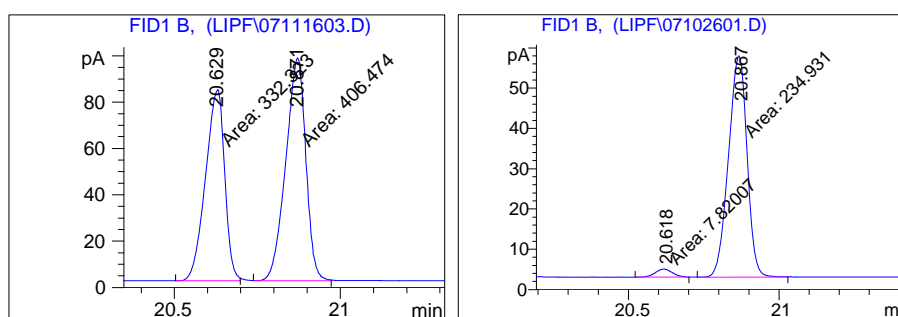

### Racemic adduct

| # | Time   | Area  | Height | Width  | Area%  | Symmetry |
|---|--------|-------|--------|--------|--------|----------|
| 1 | 20.629 | 332.3 | 83     | 0.0667 | 44.982 | 1.662    |
| 2 | 20.871 | 406.5 | 96.7   | 0.0701 | 55.018 | 1.4      |

### Asymmetric adduct

| # | Time   | Area  | Height | Width  | Area%  | Symmetry |
|---|--------|-------|--------|--------|--------|----------|
| 1 | 20.618 | 7.8   | 2      | 0.0651 | 3.221  | 0.894    |
| 2 | 20.867 | 234.9 | 54.9   | 0.0714 | 96.779 | 1.396    |

### 3-(2-nitropropan-2-yl)cyclohexanone

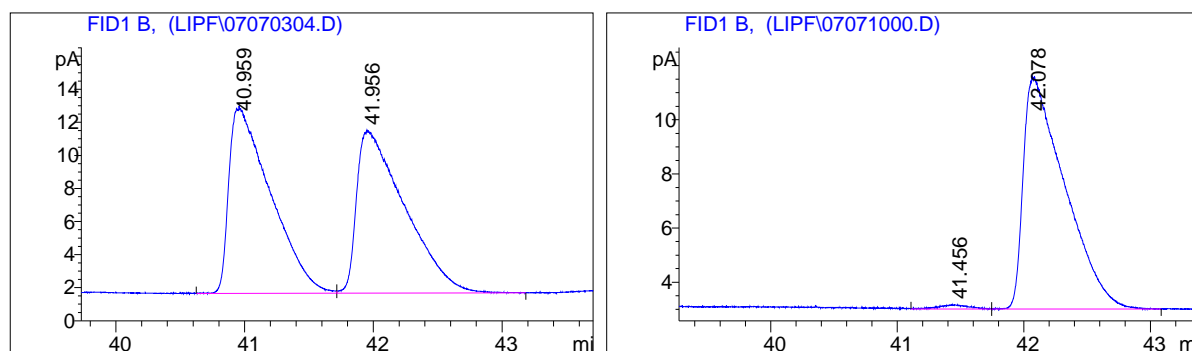

#### Racemic adduct

| # | Time   | Area  | Height | Width  | Area%  | Symmetry |
|---|--------|-------|--------|--------|--------|----------|
| 1 | 40.959 | 252.8 | 11.2   | 0.2924 | 49.897 | 0.306    |
| 2 | 41.956 | 253.8 | 9.8    | 0.3149 | 50.103 | 0.294    |

#### Asymmetric adduct

| # | Time   | Area  | Height | Width  | Area%  | Symmetry |
|---|--------|-------|--------|--------|--------|----------|
| 1 | 41.456 | 2.6   | 1.5E-1 | 0.2009 | 1.290  | 1.174    |
| 2 | 42.078 | 195.2 | 8.5    | 0.3015 | 98.710 | 0.313    |

### 3-(1-nitroethyl)cyclohexanone

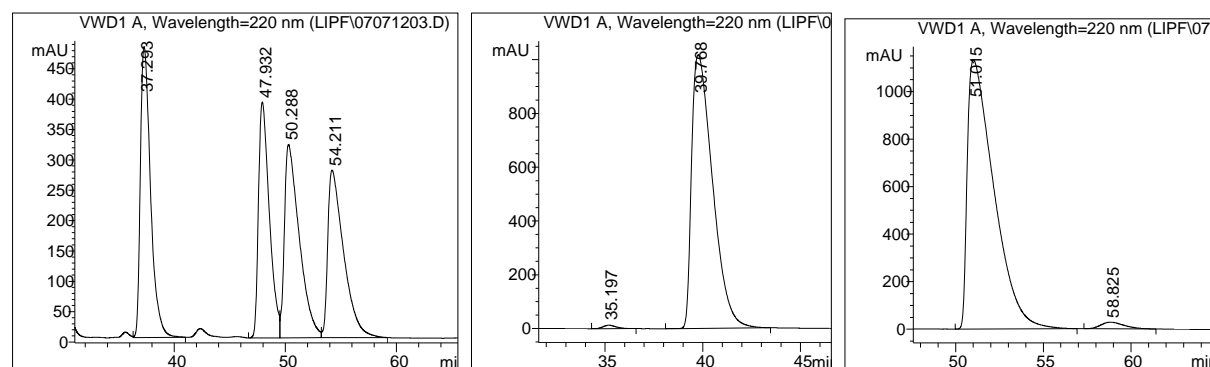

#### Racemic adduct

| # | Time   | Area    | Height | Width  | Area%  | Symmetry |
|---|--------|---------|--------|--------|--------|----------|
| 1 | 37.293 | 30595.1 | 479.1  | 1.0021 | 26.830 | 0.527    |
| 2 | 47.932 | 26288.4 | 388    | 1.0321 | 23.054 | 0.506    |
| 3 | 50.288 | 29665.9 | 318.2  | 1.3847 | 26.016 | 0.356    |
| 4 | 54.211 | 27481.8 | 275.9  | 1.4562 | 24.100 | 0.347    |

#### Asymmetric adduct (Minor)

| # | Time   | Area  | Height | Width  | Area%  | Symmetry |
|---|--------|-------|--------|--------|--------|----------|
| 1 | 35.197 | 596.9 | 12.6   | 0.721  | 0.782  | 0.717    |
| 2 | 39.768 | 75696 | 1017.5 | 1.1621 | 99.218 | 0.424    |

#### Asymmetric adduct (Major)

| # | Time   | Area     | Height | Width  | Area%  | Symmetry |
|---|--------|----------|--------|--------|--------|----------|
| 3 | 51.015 | 118938.5 | 1132.2 | 1.5401 | 97.873 | 0.278    |
| 4 | 58.825 | 2584.8   | 27.9   | 1.4056 | 2.127  | 0.671    |

### 3-methyl-3-(1-nitroethyl)cyclohexanone

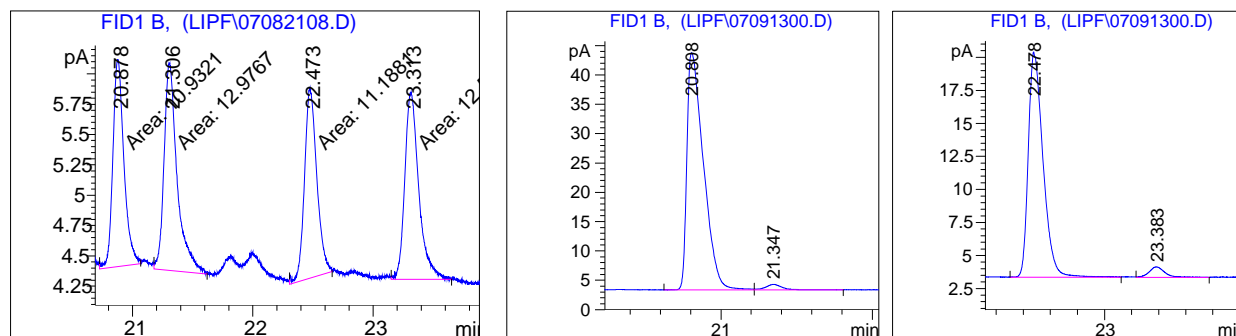

#### Racemic adduct

| # | Time   | Area | Height | Width  | Area%  | Symmetry |
|---|--------|------|--------|--------|--------|----------|
| 1 | 20.878 | 10.9 | 1.7    | 0.1068 | 22.965 | 0.833    |
| 2 | 21.306 | 13   | 1.7    | 0.1268 | 27.260 | 0.649    |
| 3 | 22.473 | 11.2 | 1.6    | 0.1195 | 23.503 | 0.722    |
| 4 | 23.313 | 12.5 | 1.5    | 0.136  | 26.272 | 0.66     |

#### Asymmetric adduct (Major)

| # | Time   | Area  | Height | Width  | Area%  | Symmetry |
|---|--------|-------|--------|--------|--------|----------|
| 1 | 20.808 | 306.4 | 40.3   | 0.1126 | 97.625 | 0.387    |
| 2 | 21.347 | 7.5   | 9.2E-1 | 0.1225 | 2.375  | 0.75     |

#### Asymmetric adduct (Minor)

| # | Time   | Area  | Height | Width  | Area%  | Symmetry |
|---|--------|-------|--------|--------|--------|----------|
| 3 | 22.478 | 129.2 | 17     | 0.1185 | 95.262 | 0.582    |
| 4 | 23.383 | 6.4   | 7.8E-1 | 0.1202 | 4.738  | 0.785    |

### 4,4-dimethyl-3-(1-nitroethyl)cyclohexanone

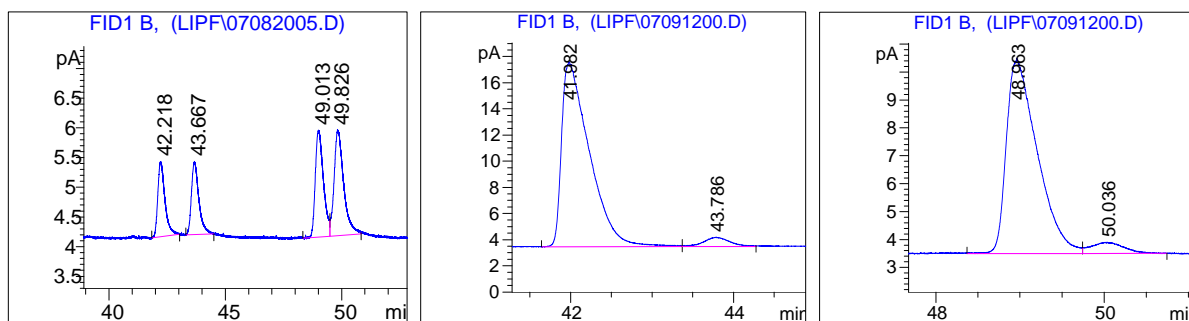

#### Racemic adduct

| # | Time   | Area | Height | Width  | Area%  | Symmetry |
|---|--------|------|--------|--------|--------|----------|
| 1 | 42.218 | 27   | 1.3    | 0.2926 | 18.205 | 0.624    |
| 2 | 43.667 | 27.1 | 1.2    | 0.2979 | 18.239 | 0.624    |
| 3 | 49.013 | 43.6 | 1.8    | 0.3021 | 29.365 | 0.708    |
| 4 | 49.826 | 50.8 | 1.8    | 0.3457 | 34.191 | 0.602    |

#### Asymmetric adduct (Major)

| # | Time   | Area  | Height | Width  | Area%  | Symmetry |
|---|--------|-------|--------|--------|--------|----------|
| 1 | 41.982 | 333.6 | 14.1   | 0.3078 | 95.423 | 0.337    |
| 2 | 43.786 | 16    | 7.1E-1 | 0.2745 | 4.577  | 0.866    |

#### Asymmetric adduct (Minor)

| # | Time   | Area  | Height | Width  | Area%  | Symmetry |
|---|--------|-------|--------|--------|--------|----------|
| 3 | 48.963 | 177.4 | 7      | 0.3026 | 94.231 | 0.502    |
| 4 | 50.036 | 10.9  | 3.9E-1 | 0.3279 | 5.769  | 0.928    |

### 5-nitro-4-phenylpentan-2-one

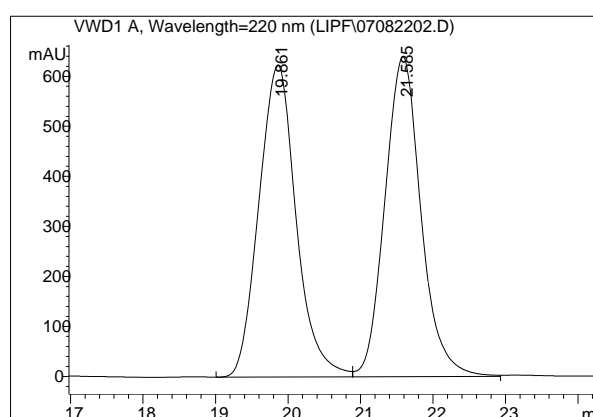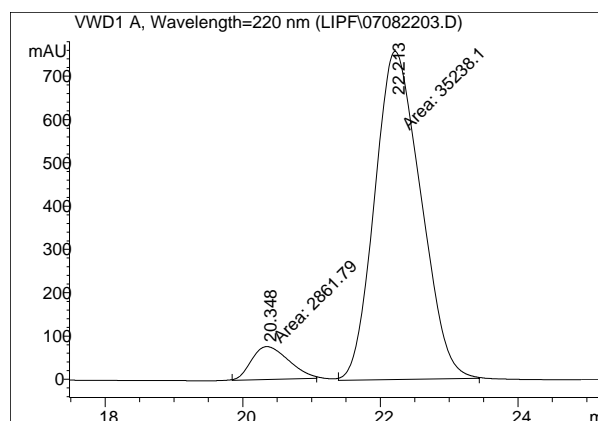

#### Racemic adduct

| # | Time   | Area    | Height | Width  | Area%  | Symmetry |
|---|--------|---------|--------|--------|--------|----------|
| 1 | 19.861 | 22236.6 | 623.4  | 0.553  | 50.139 | 0.976    |
| 2 | 21.585 | 22113.5 | 639.5  | 0.5345 | 49.861 | 0.939    |

#### Asymmetric adduct

| # | Time   | Area    | Height | Width  | Area%  | Symmetry |
|---|--------|---------|--------|--------|--------|----------|
| 1 | 20.348 | 2861.8  | 76.2   | 0.626  | 7.511  | 0.697    |
| 2 | 22.213 | 35238.1 | 758.2  | 0.7746 | 92.489 | 0.781    |

### 5-nitro-4-(4-nitrophenyl)pentan-2-one

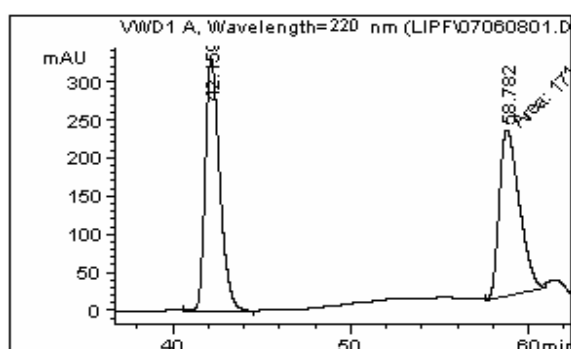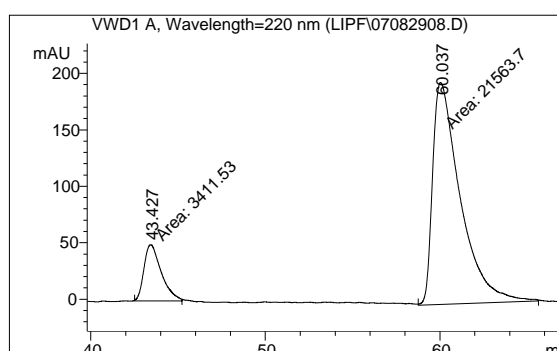

#### Racemic adduct

| # | Time   | Area    | Height | Width  | Area%  | Symmetry |
|---|--------|---------|--------|--------|--------|----------|
| 1 | 42.159 | 19043.3 | 332.1  | 0.8758 | 52.598 | 0.669    |
| 2 | 58.782 | 17162   | 218    | 1.3124 | 47.402 | 0.604    |



### Asymmetric adduct

| # | Time   | Area    | Height | Width  | Area%  | Symmetry |
|---|--------|---------|--------|--------|--------|----------|
| 1 | 43.427 | 3411.5  | 49.7   | 1.1434 | 13.660 | 0.614    |
| 2 | 60.037 | 21563.7 | 196.4  | 1.8296 | 86.340 | 0.39     |

### 5-nitro-4-p-tolylpentan-2-one

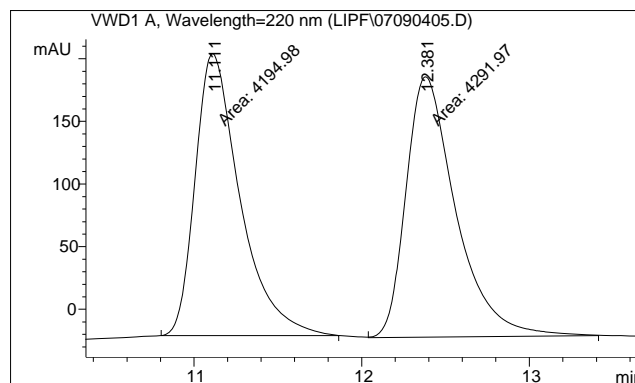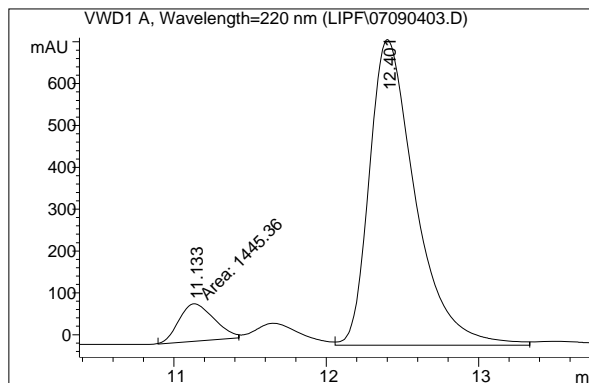

### Racemic adduct

| # | Time   | Area | Height | Width  | Area%  | Symmetry |
|---|--------|------|--------|--------|--------|----------|
| 1 | 11.111 | 4195 | 225.2  | 0.3105 | 49.429 | 0.618    |
| 2 | 12.381 | 4292 | 207.8  | 0.3442 | 50.571 | 0.616    |

### Asymmetric adduct

| # | Time    | Area    | Height | Width  | Area%  | Symmetry |
|---|---------|---------|--------|--------|--------|----------|
| 1 | 11.133  | 1445.4  | 89.9   | 0.268  | 8.629  | 0.776    |
| 2 | 12.4014 | 15305.3 | 730.5  | 0.3158 | 91.371 | 0.597    |

### 5-nitro-4-o-tolylpentan-2-one

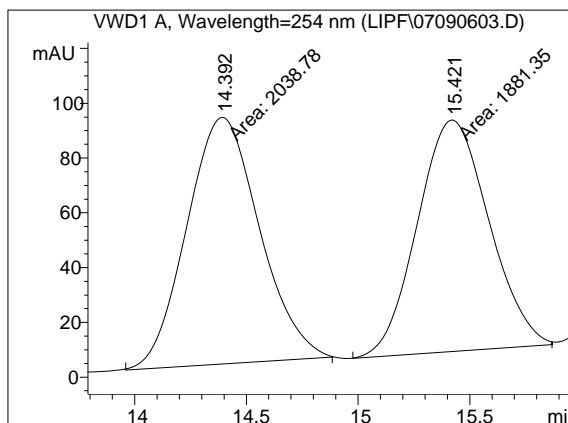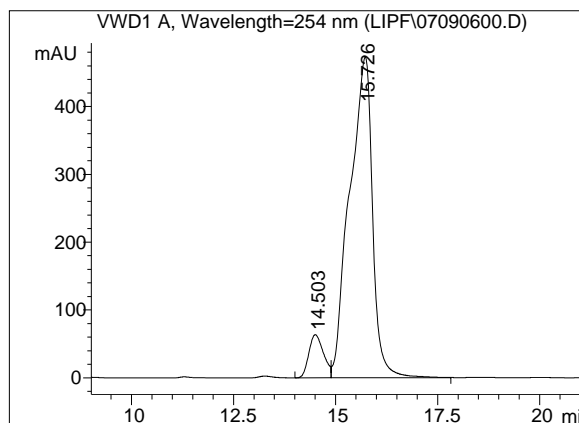

### Racemic adduct

| # | Time   | Area   | Height | Width  | Area%  | Symmetry |
|---|--------|--------|--------|--------|--------|----------|
| 1 | 14.392 | 2038.8 | 90     | 0.3773 | 52.008 | 0.929    |
| 2 | 15.421 | 1881.4 | 84.5   | 0.3711 | 47.992 | 0.925    |

### Asymmetric adduct

| # | Time   | Area    | Height | Width  | Area%  | Symmetry |
|---|--------|---------|--------|--------|--------|----------|
| 1 | 14.503 | 1595.1  | 63.6   | 0.3872 | 7.999  | 0.756    |
| 2 | 15.726 | 18346.7 | 473.5  | 0.5438 | 92.001 | 1.958    |

### 4-(4-methoxyphenyl)-5-nitropentan-2-one

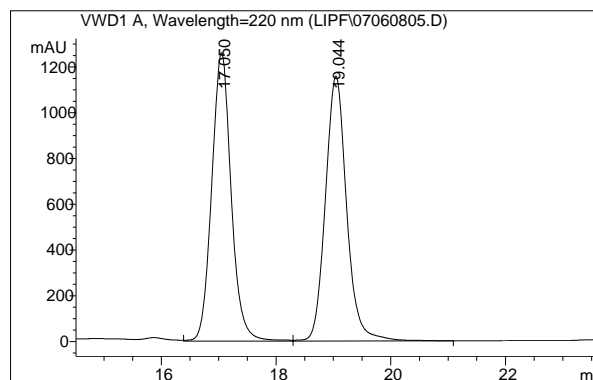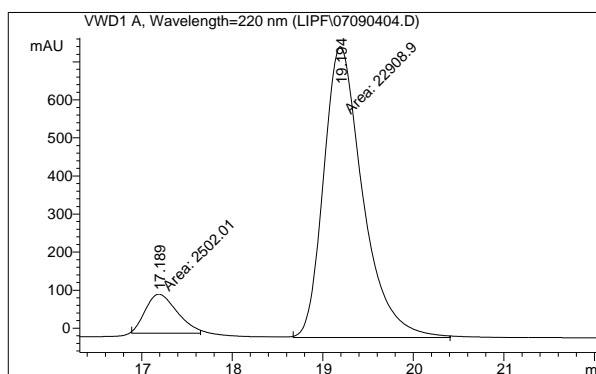

### Racemic adduct

| # | Time   | Area    | Height | Width  | Area%  | Symmetry |
|---|--------|---------|--------|--------|--------|----------|
| 1 | 17.05  | 29631.3 | 1260.3 | 0.3602 | 49.957 | 0.949    |
| 2 | 19.044 | 29682.2 | 1157.3 | 0.3924 | 50.043 | 0.908    |

### Asymmetric adduct

| # | Time    | Area    | Height | Width  | Area%  | Symmetry |
|---|---------|---------|--------|--------|--------|----------|
| 1 | 17.189  | 2502    | 102.9  | 0.4051 | 9.846  | 0.718    |
| 2 | 419.194 | 22908.9 | 764.4  | 0.4995 | 90.154 | 0.715    |

### 4-(2-methoxyphenyl)-5-nitropentan-2-one

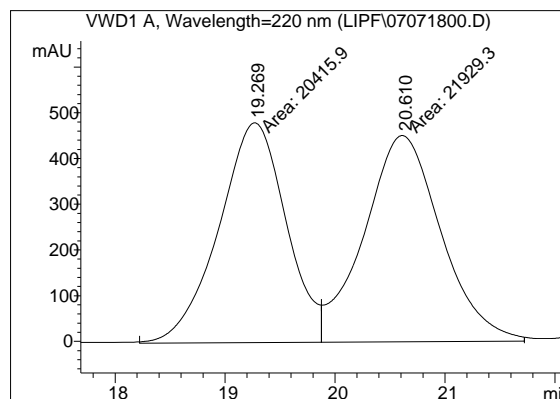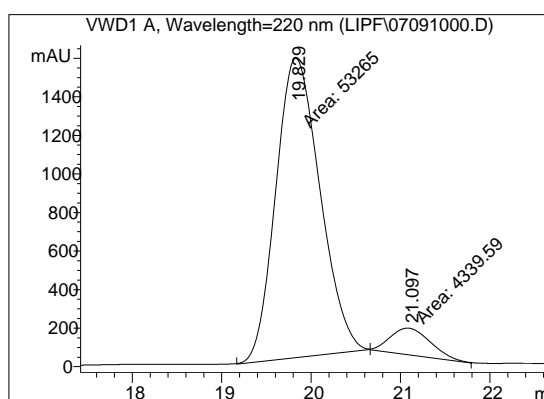

### Racemic adduct

| # | Time   | Area    | Height | Width  | Area%  | Symmetry |
|---|--------|---------|--------|--------|--------|----------|
| 1 | 19.269 | 20415.9 | 480.4  | 0.7083 | 48.213 | 1.123    |
| 2 | 20.610 | 21929.3 | 450.7  | 0.8109 | 51.787 | 0.95     |

### Asymmetric adduct

| # | Time   | Area   | Height | Width  | Area%  | Symmetry |
|---|--------|--------|--------|--------|--------|----------|
| 1 | 19.829 | 53265  | 1552.6 | 0.5718 | 92.467 | 0.805    |
| 2 | 21.097 | 4339.6 | 138.6  | 0.5219 | 7.533  | 0.707    |

### 4-(4-chlorophenyl)-5-nitropentan-2-one

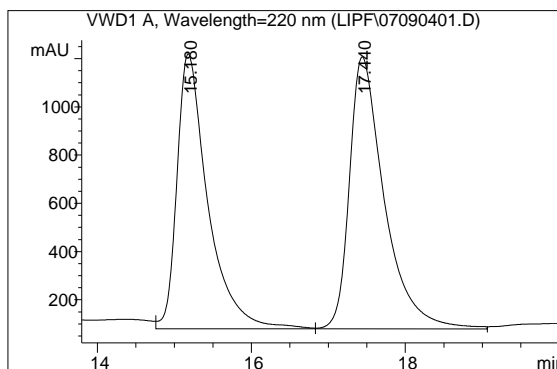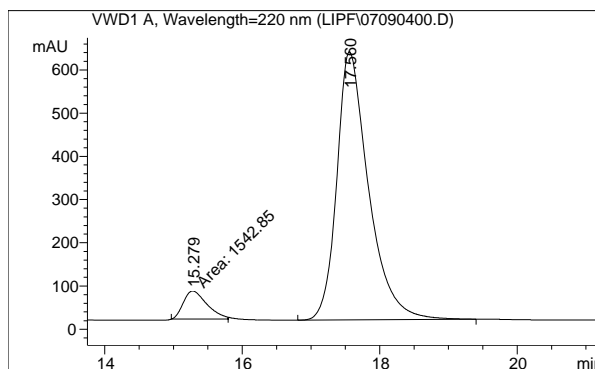

### Racemic adduct

| # | Time  | Area    | Height | Width | Area%  | Symmetry |
|---|-------|---------|--------|-------|--------|----------|
| 1 | 15.18 | 31762.1 | 1140.2 | 0.408 | 47.208 | 0.529    |
| 2 | 17.44 | 35518.5 | 1127.8 | 0.465 | 52.792 | 0.538    |

### Asymmetric adduct

| # | Time   | Area    | Height | Width  | Area%  | Symmetry |
|---|--------|---------|--------|--------|--------|----------|
| 1 | 15.279 | 1542.8  | 65     | 0.3957 | 7.193  | 0.631    |
| 2 | 17.56  | 19907.6 | 620.6  | 0.4747 | 92.807 | 0.622    |

### 5-nitro-4-(thiophen-2-yl)pentan-2-one

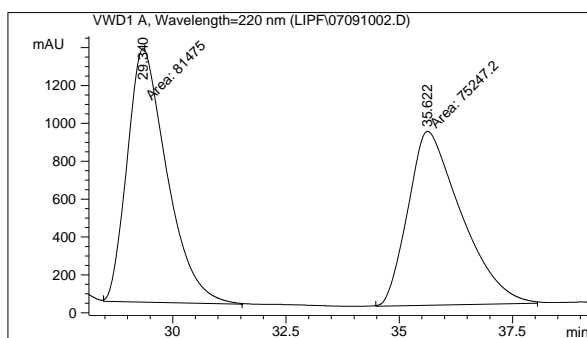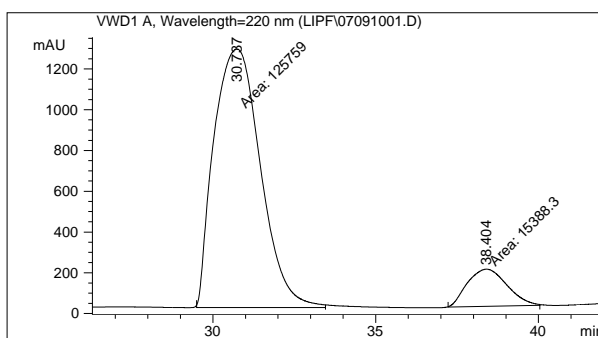

### Racemic adduct

| # | Time   | Area    | Height | Width  | Area%  | Symmetry |
|---|--------|---------|--------|--------|--------|----------|
| 1 | 29.34  | 81475   | 1339.1 | 1.014  | 51.987 | 0.638    |
| 2 | 35.622 | 75247.2 | 918.6  | 1.3652 | 48.013 | 0.567    |

### Asymmetric adduct

| # | Time   | Area     | Height | Width  | Area%  | Symmetry |
|---|--------|----------|--------|--------|--------|----------|
| 1 | 30.737 | 125759.1 | 1267.4 | 1.6537 | 89.098 | 0.925    |
| 2 | 38.404 | 15388.3  | 182    | 1.4095 | 10.902 | 0.921    |

### 4-(nitromethyl)heptan-2-one

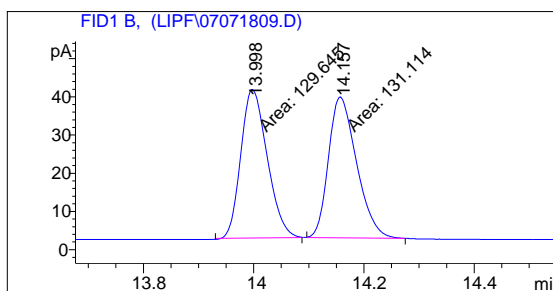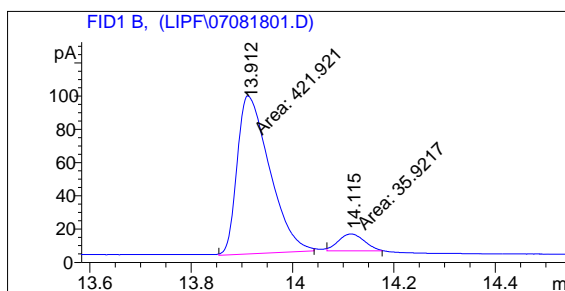

#### Racemic adduct

| # | Time   | Area  | Height | Width  | Area%  | Symmetry |
|---|--------|-------|--------|--------|--------|----------|
| 1 | 13.998 | 129.6 | 39.1   | 0.0552 | 49.718 | 0.753    |
| 2 | 14.157 | 131.1 | 37     | 0.059  | 50.282 | 0.683    |

#### Asymmetric adduct

| # | Time   | Area  | Height | Width  | Area%  | Symmetry |
|---|--------|-------|--------|--------|--------|----------|
| 1 | 13.912 | 421.9 | 95     | 0.074  | 92.154 | 0.571    |
| 2 | 14.115 | 35.9  | 10.2   | 0.0589 | 7.846  | 0.889    |

### 4-(nitromethyloctan-2-one

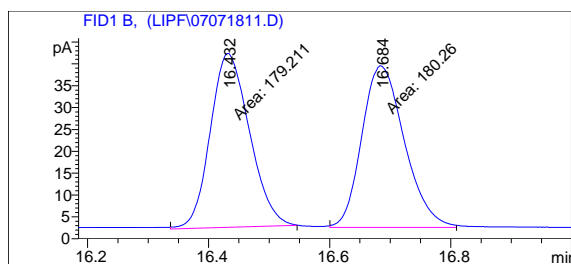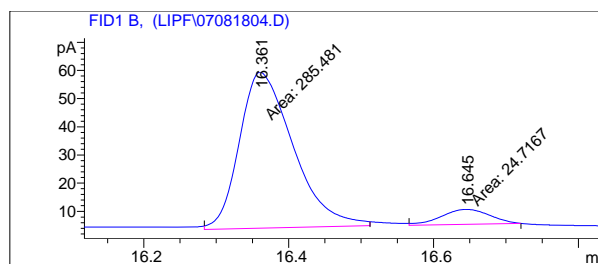

#### Racemic adduct

| # | Time   | Area  | Height | Width  | Area%  | Symmetry |
|---|--------|-------|--------|--------|--------|----------|
| 1 | 16.432 | 179.2 | 39.9   | 0.0748 | 49.854 | 0.762    |
| 2 | 16.684 | 180.3 | 37     | 0.0813 | 50.146 | 0.883    |

#### Asymmetric adduct

| # | Time   | Area  | Height | Width  | Area%  | Symmetry |
|---|--------|-------|--------|--------|--------|----------|
| 1 | 16.361 | 285.5 | 55.5   | 0.0857 | 92.032 | 0.548    |
| 2 | 16.645 | 24.7  | 5.3    | 0.0773 | 7.968  | 1.159    |

### 5-methyl-5-nitro-4-phenylhexan-2-one

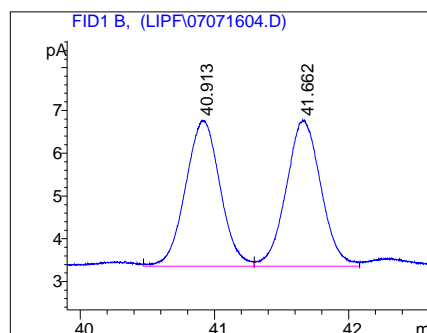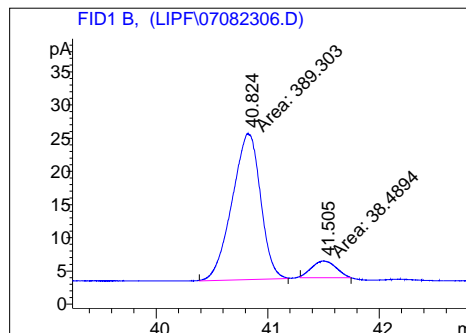

### Racemic adduct

| # | Time   | Area | Height | Width  | Area%  | Symmetry |
|---|--------|------|--------|--------|--------|----------|
| 1 | 40.913 | 60.9 | 3.4    | 0.2389 | 49.860 | 0.987    |
| 2 | 41.662 | 61.3 | 3.4    | 0.2386 | 50.140 | 0.98     |

### Asymmetric adduct

| # | Time   | Area  | Height | Width  | Area%  | Symmetry |
|---|--------|-------|--------|--------|--------|----------|
| 1 | 40.824 | 389.3 | 22     | 0.295  | 91.003 | 1.303    |
| 2 | 41.505 | 38.5  | 2.5    | 0.2548 | 8.997  | 1.039    |

### 5-nitro-4-phenylhexan-2-one

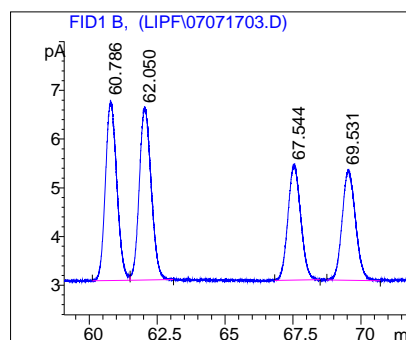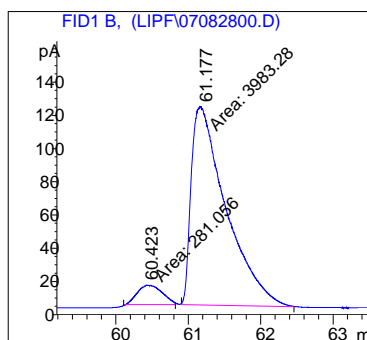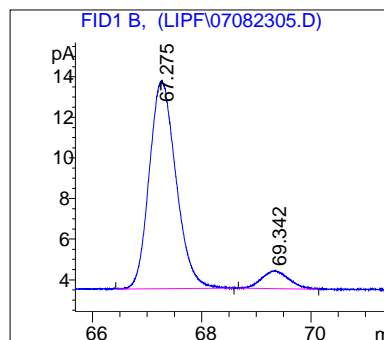

### Racemic adduct

| # | Time   | Area | Height | Width  | Area%  | Symmetry |
|---|--------|------|--------|--------|--------|----------|
| 1 | 60.786 | 107  | 3.7    | 0.3574 | 28.932 | 0.781    |
| 2 | 62.050 | 108  | 3.5    | 0.3903 | 29.221 | 0.822    |
| 3 | 67.544 | 77.5 | 2.4    | 0.4151 | 20.949 | 0.907    |
| 4 | 69.531 | 77.3 | 2.3    | 0.4109 | 20.898 | 0.811    |

### Asymmetric adduct (major)

| # | Time   | Area   | Height | Width  | Area%  | Symmetry |
|---|--------|--------|--------|--------|--------|----------|
| 1 | 60.423 | 281.1  | 11.7   | 0.4004 | 6.591  | 0.586    |
| 2 | 61.177 | 3983.3 | 119.3  | 0.5565 | 93.409 | 0.388    |

### Asymmetric adduct (minor)

| # | Time   | Area  | Height | Width  | Area%  | Symmetry |
|---|--------|-------|--------|--------|--------|----------|
| 1 | 67.275 | 347.5 | 10.3   | 0.4013 | 91.948 | 0.89     |
| 2 | 69.342 | 30.4  | 8.6E-1 | 0.4215 | 8.052  | 0.932    |

## E: References

1. Y. Moritani, D. H. Appella, V. Jurkauskas, and S. L. Buchwald, *J. Am. Chem. Soc.* **2000**, *122*, 6797-6798.
2. J. V. Sinisterra, A Garcia-Raso, *Synthesis* **1984**, *6*, 502-504.
3. a) J. F. Larrow and E. N. Jacobsen, *Organic Syntheses* **1998**, *75*, 1-6; b) P. Lagriffoule, P. Wittung, M. Eriksson, K. K. Jensen, B. Norden, O. Buchardt, P. E. Nielsen, *Chem. Eur. J.* **1997**, *3*, 912-919; c) J. Smith, J. L. Liras, S. E. Schneider, E. V. Anslyn, *J. Org. Chem.* **1996**, *61*, 8811-8818; d) J. X. Ye, D. J. Dixon, P. S. Hynes, *Chem. Commun.* **2005**, 4481-4483; e) D. E. Fuerst, E. N. Jacobsen, *J. Am. Chem. Soc.* **2005**, *127*, 8964-8965; f) B. Vakulya, S. Varga, A. Csámpai, and T. Soós, *Org. Lett.* **2005**, *7*, 1967-1969.
4. a) M. Yamaguchi, Y. Igarashi, R. S. Reddy, T. Shiraishi, M. Hirama, *Tetrahedron* **1997**, *53*, 11223-11236; b) S. Hanessian, V. Pham, *Org. Lett.* **2000**, *2*, 2975-2978; c) N. Halland, R. G. Hazell, K. A. Jørgensen, *J. Org. Chem.* **2002**, *67*, 8331-8338; d) C. E. T. Mitchell, S. E. Brenner, J. García-Fortanet and S. V. Ley, *Org. Biomol. Chem.* **2006**, *4*, 2039-2049.
